# Supplementary material for: SHP2 acts both upstream and downstream of multiple receptor tyrosine kinases to promote basal-like and triple-negative breast cancer
Source: PubMed Central journal article supplement (PMC4700603; doi:10.1186/s13058-015-0659-z), 2016-01-04
Supplement: 13058_2015_659_MOESM2_ESM.pdf [file 13058_2015_659_MOESM2_ESM.pdf]

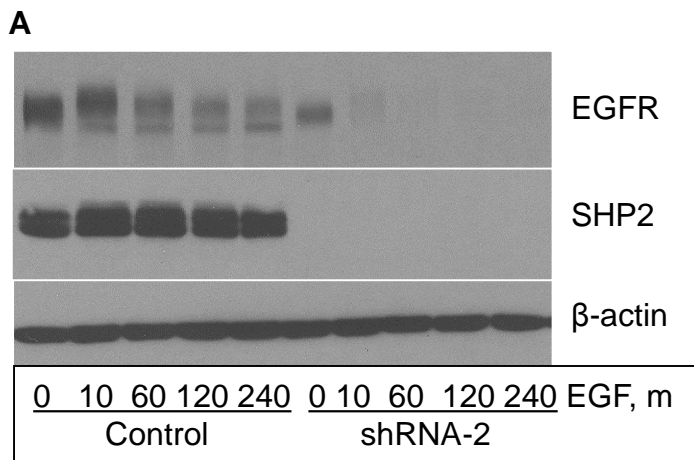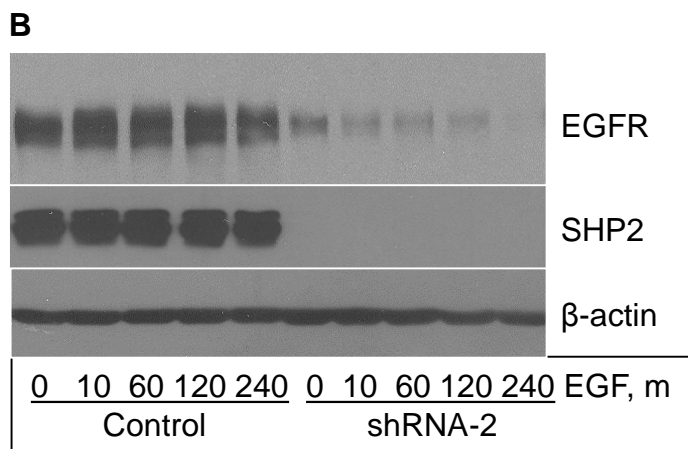

**Supplementary Figure 2A and B:** Silencing SHP2 expression in the MDA-MB231 (**A**) and MDA-MB468 (**B**) cells drastically reduced EGFR protein level, which became hypersensitive to EGF-induced degradation.

**C**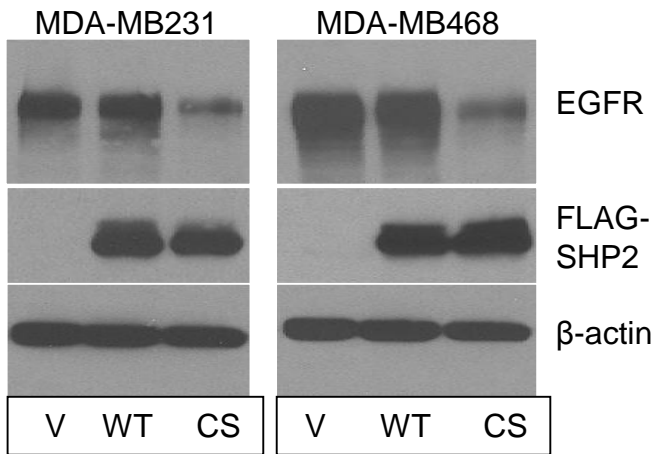**D**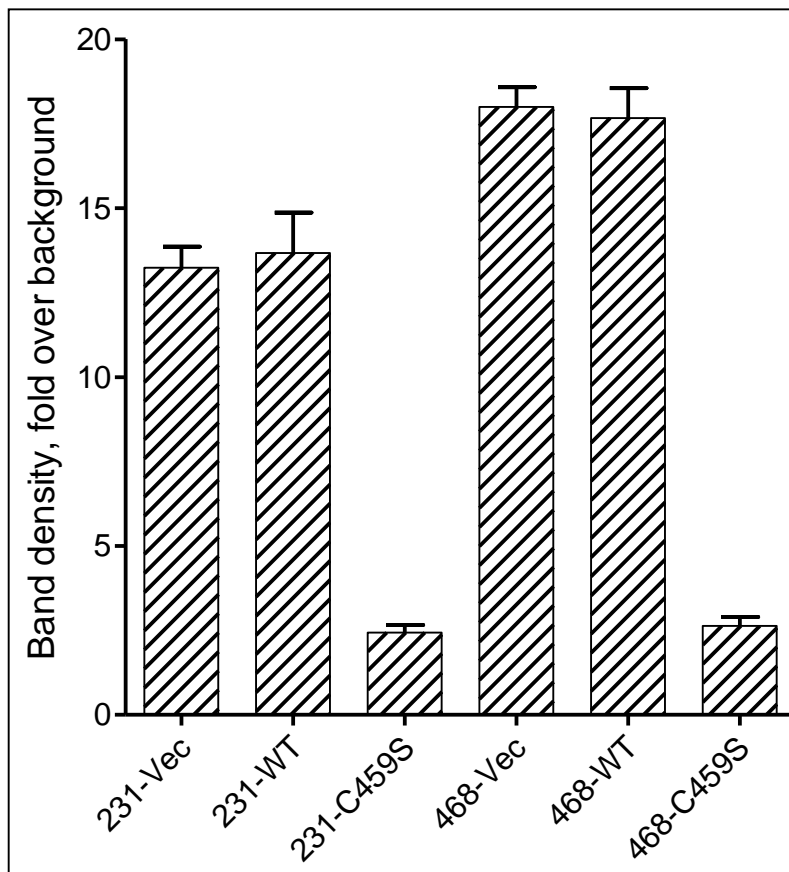

**Supplementary Figure 2C and D:** Inhibition of SHP2 by dominant-negative (C459S-SHP2) expression led to a similar decrease (similar to shRNA-based inhibition) in EGFR protein level, but expression of vector alone or wild-type SHP2 (WT-SHP) did not. **A)** Immunoblotting data and **B)** bar graph showing band density measurement values of the immunoblotting data. The values represent at least three independent experiments.
