# Supplementary material for: SHP2 acts both upstream and downstream of multiple receptor tyrosine kinases to promote basal-like and triple-negative breast cancer
Source: PubMed Central journal article supplement (PMC4700603; doi:10.1186/s13058-015-0659-z), 2016-01-04
Supplement: 13058_2015_659_MOESM5_ESM.pdf [file 13058_2015_659_MOESM5_ESM.pdf]

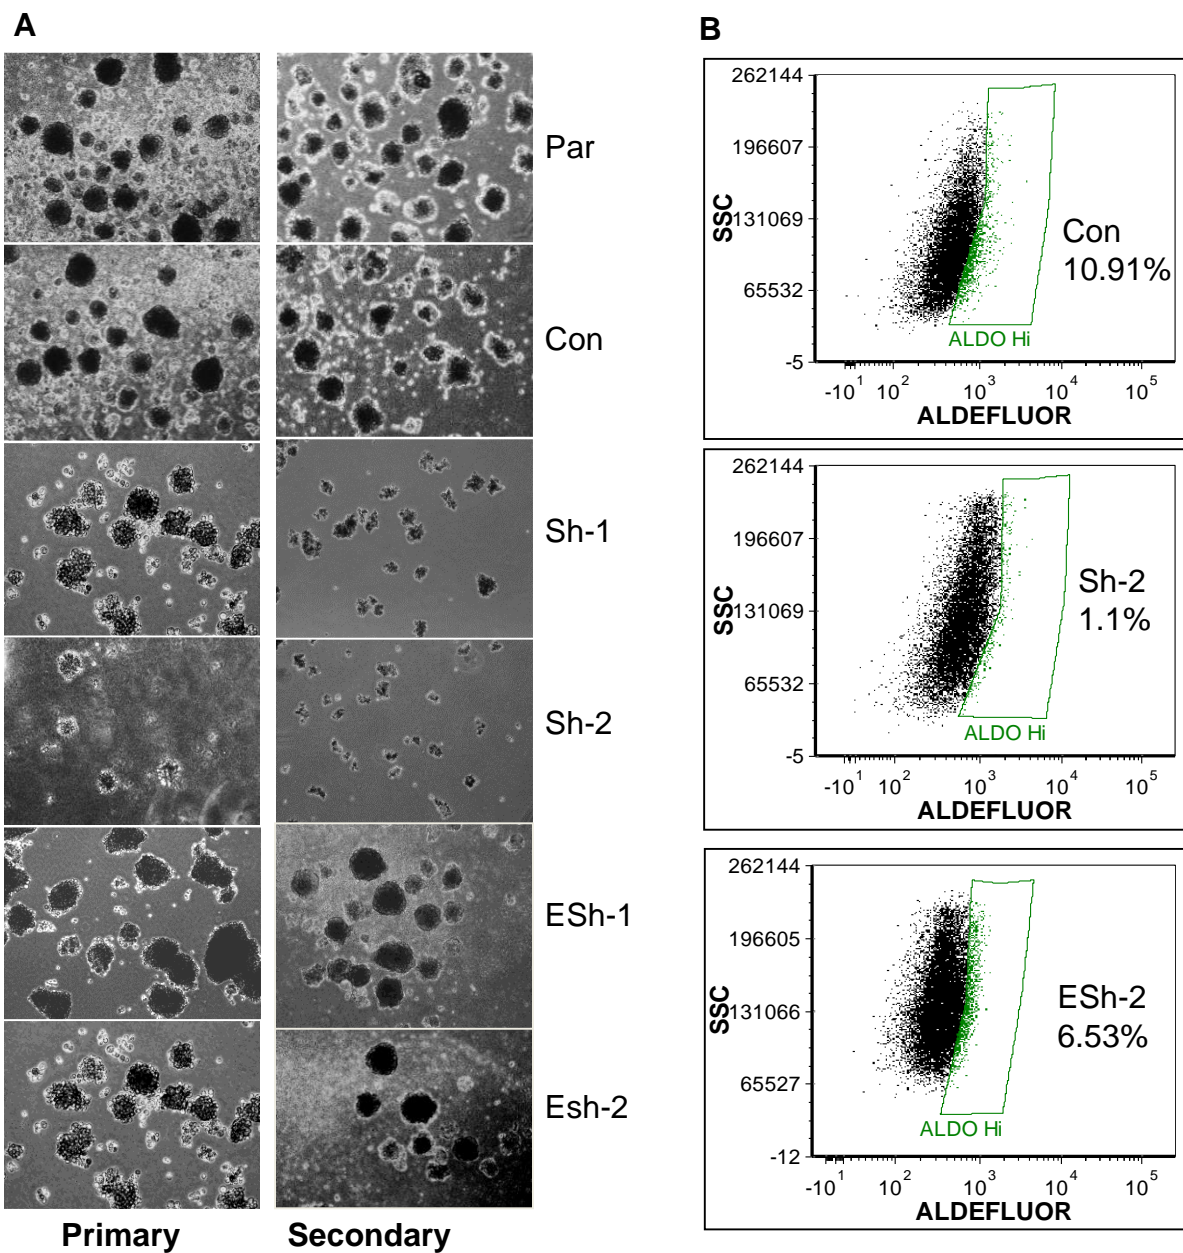

**Supplementary Figure 5: A)** Effect of SHP2 and EGFR silencing on primary and secondary mammosphere formation by the MDA-MB468 cells. Note that mammosphere-forming capacity of the SHP2-silenced cells was exhausted in secondary passaging, while a modest reduction was observed in the EGFR silenced cells. **B)** Effect of SHP2 and EGFR silencing on proportion of ALDH1-high cells. Silencing SHP2 expression drastically reduced the ALDH1-high cells, but silencing EGFR had only a modest effect.
